# Supplementary material for: Hypertension in the United States Fire Service
Source: MDPI journal article supplement (doi:10.3390/ijerph18105432), 2021-05-19
Supplement: s1 [file s1]

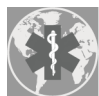

**Table S1.** Descriptive statistics of firefighter cohorts across geographical locations.

| Characteristics                          | M-A Cohort   | M-W Cohort                | S-W Cohort                 | S-E Cohort                 | M-A Cohort   | M-W Cohort                |
|------------------------------------------|--------------|---------------------------|----------------------------|----------------------------|--------------|---------------------------|
|                                          | Male         | Male                      | Male                       | Male                       | Female       | Female                    |
| N                                        | 858          | 3310                      | 558                        | 337                        | 102          | 172                       |
| Age (years)                              | 40.5 ± 9.0   | 42.5 ± 9.1 <sup>a</sup>   | 42.9 ± 8.9 <sup>a</sup>    | 37.8 ± 10.2 <sup>abc</sup> | 39.1 ± 8.7   | 40.0 ± 8.9                |
| White <i>n</i> (%)                       | 615 (72)     | 2965 (91) <sup>a</sup>    | 445 (83) <sup>ab</sup>     | n/a                        | 80 (78)      | 151 (90) <sup>a</sup>     |
| African American/Black <i>n</i> (%)      | 127 (15)     | 210 (6) <sup>a</sup>      | 11 (2) <sup>ab</sup>       | n/a                        | 14 (14)      | 11 (7) <sup>a</sup>       |
| Other <i>n</i> (%)                       | 116 (14)     | 92 (3) <sup>a</sup>       | 80 (15) <sup>ab</sup>      | n/a                        | 8 (8)        | 5 (3) <sup>a</sup>        |
| Height (m)                               | 1.8 ± 0.1    | 1.8 ± 0.1                 | 1.8 ± 0.1 <sup>ab</sup>    | 1.8 ± 0.1 <sup>ab</sup>    | 1.7 ± 0.1    | 1.7 ± 0.1                 |
| Body Weight (kg)                         | 92.4 ± 14.3  | 97.7 ± 17.2 <sup>a</sup>  | 93.1 ± 15.1 <sup>b</sup>   | 94.2 ± 16.3 <sup>b</sup>   | 73.0 ± 12.3  | 80.3 ± 18.3 <sup>a</sup>  |
| Body Mass Index (kg·m <sup>-2</sup> )    | 28.9 ± 3.9   | 30.3 ± 4.7 <sup>a</sup>   | 28.7 ± 4.0 <sup>b</sup>    | 28.9 ± 4.4 <sup>b</sup>    | 26.1 ± 4.0   | 28.7 ± 5.7 <sup>a</sup>   |
| Normal <i>n</i> (%) <sup>1</sup>         | 118 (14)     | 336 (10) <sup>a</sup>     | 87 (16) <sup>b</sup>       | 57 (17) <sup>b</sup>       | 43 (43)      | 50 (29) <sup>a</sup>      |
| Overweight <i>n</i> (%) <sup>2</sup>     | 430 (51)     | 1385 (42) <sup>a</sup>    | 282 (53) <sup>b</sup>      | 168 (50) <sup>b</sup>      | 42 (42)      | 59 (35) <sup>a</sup>      |
| Obese <i>n</i> (%) <sup>3</sup>          | 293 (35)     | 1575 (48) <sup>a</sup>    | 166 (31) <sup>b</sup>      | 112 (33) <sup>b</sup>      | 14 (14)      | 61 (36) <sup>a</sup>      |
| Systolic Blood Pressure (mmHg)           | 120.4 ± 10.6 | 126.2 ± 10.0 <sup>a</sup> | 121.8 ± 11.8 <sup>ab</sup> | 121.7 ± 7.5 <sup>ab</sup>  | 114.2 ± 12.6 | 119.7 ± 10.6 <sup>a</sup> |
| Diastolic Blood Pressure (mmHg)          | 77.3 ± 7.9   | 82.9 ± 5.9 <sup>a</sup>   | 78.8 ± 7.2 <sup>ab</sup>   | 77.2 ± 5.3 <sup>bc</sup>   | 72.3 ± 7.7   | 78.5 ± 7.2 <sup>a</sup>   |
| Hypertension <i>n</i> (%) <sup>4</sup>   | 437 (51)     | 2541 (78) <sup>a</sup>    | 322 (60) <sup>ab</sup>     | n/a                        | 25 (25)      | 70 (42) <sup>a</sup>      |
| Antihypertensive Medication <i>n</i> (%) | 135 (16)     | 596 (18)                  | 73 (14) <sup>b</sup>       | n/a                        | 6 (6)        | 25 (15) <sup>a</sup>      |

Data presented as *n* (%) or mean ± standard deviation. <sup>1</sup> Normal BMI defined as <25 kg·m<sup>-2</sup>; <sup>2</sup> Overweight BMI defined as 25–29.9 kg·m<sup>-2</sup>; <sup>3</sup> Obese BMI defined as ≥30 kg·m<sup>-2</sup>; <sup>4</sup> Hypertension defined as systolic blood pressure ≥130 mmHg, or diastolic blood pressure ≥80 mmHg, or taking antihypertensive medication; M-A, Mid-Atlantic; M-W, Midwest; S-W, Southwest; S-E, Southeast. For males, ANOVA models with *post-hoc* comparisons and chi-squared tests were conducted to test for statistical differences between the cohorts. For females, t-tests and chi-squared tests were conducted to test for statistical differences between the cohorts. <sup>a</sup> Indicates a statistical difference with the M-A Cohort., <sup>b</sup> indicates a statistical difference with the M-W Cohort, <sup>c</sup> indicates a statistical difference with the S-W Cohort. The level of significance for all analyses was considered at *p* < 0.05.
